# Supplementary material for: An electrochemical sensor based on poly(procaterol hydrochloride)/carboxyl multi-walled carbon nanotube for the determination of bromhexine hydrochloride
Source: Royal Society of Chemistry journal article supplement (doi:10.1039/c8ra08510b), 2019-01-01
Supplement: c8ra08510b1.pdf [file c8ra08510b1.pdf]

# **An electrochemical sensor based poly(procaterol hydrochloride)/ carboxyl multi-walled carbon nanotube for the determination of bromhexine hydrochloride**

Dexian Kong<sup>\*a</sup>, Libin Han<sup>a</sup>, Zeming Wang<sup>a</sup>, Lili Jiang<sup>b</sup>, Qian Zhang<sup>a</sup>, Qiong Wu<sup>a</sup>,  
Jinwei Su<sup>a</sup>, ChunHua Lu<sup>\*b</sup>, Guonan Chen<sup>b</sup>

<sup>a</sup> College of Life Sciences, Fujian Agriculture and Forestry University, Fuzhou, Fujian  
350002, China

<sup>b</sup> College of Chemistry, Fuzhou University, Fujian, 350108, China

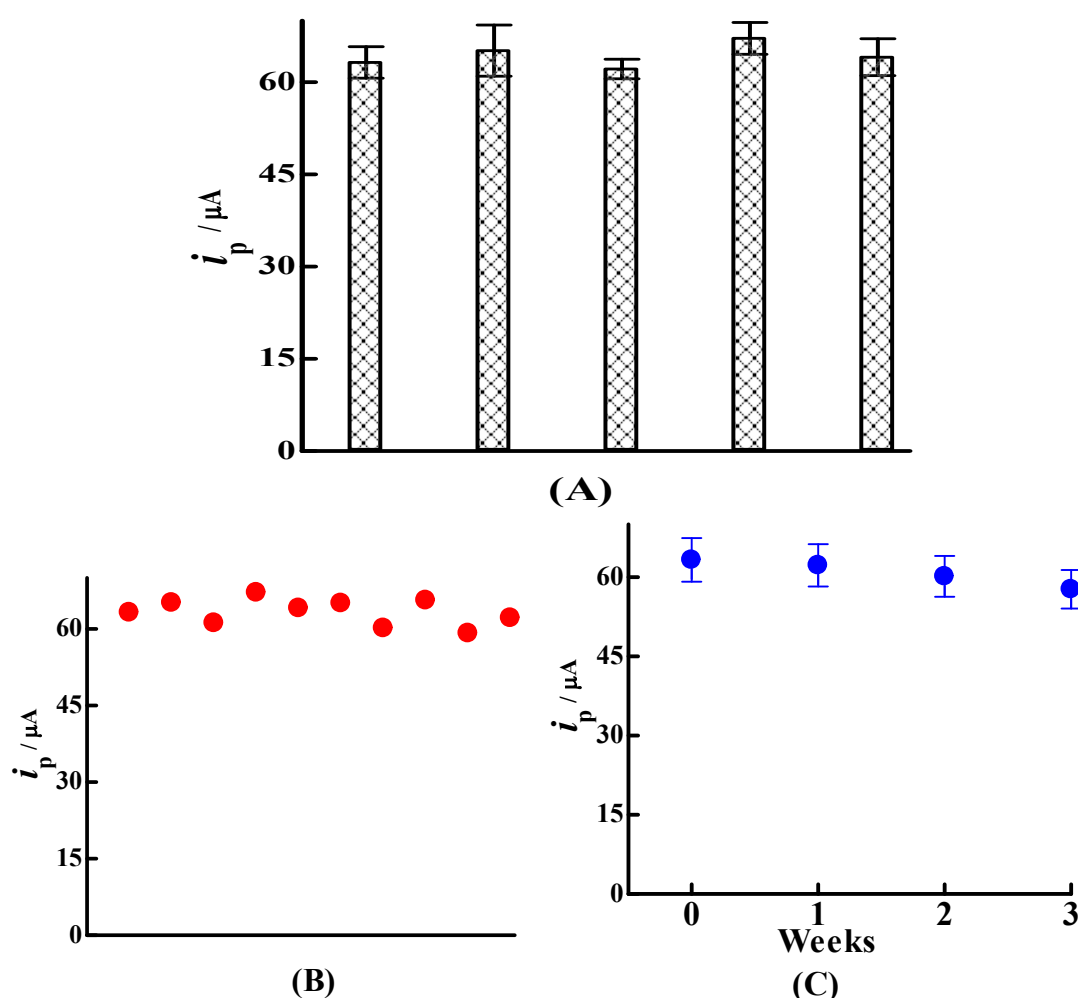

Fig. S1 The oxidation peak current of  $2 \times 10^{-5} \text{ mol} \cdot \text{L}^{-1}$  BrH at p-ProH/CMWCNTS/GCE in  $0.2 \text{ mol} \cdot \text{L}^{-1}$  PBS (pH 5.5) in reproducibility, repeatability and stability studies.

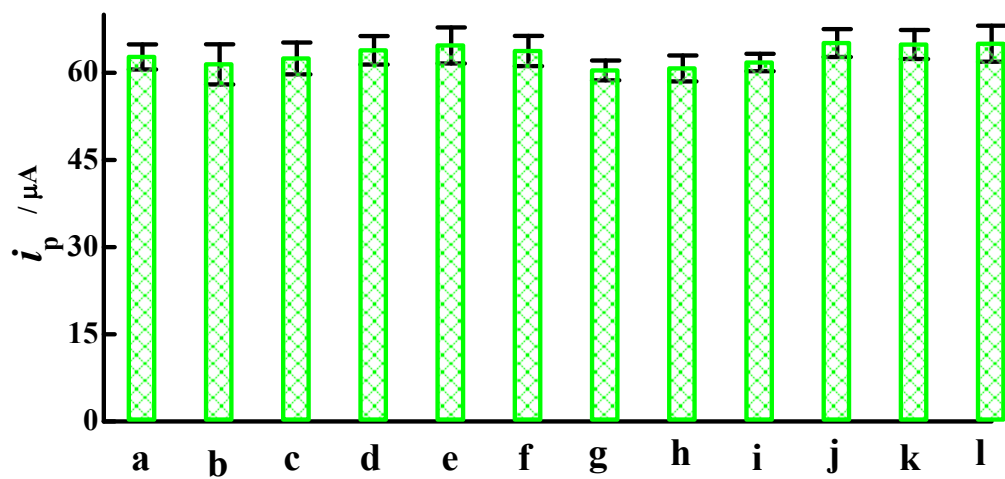

Fig. S2 The interferences study of p-ProH/CMWCNTS/GCE to  $2 \times 10^{-5} \text{ mol}\cdot\text{L}^{-1} \text{ BrH}$  (a) added 500 folds citric acid (b), magnesium chloride (c) and magnesium stearate (d), 250 folds sucrose (e), glucose (f), fructose (g), maltose (h) and lactose (i), 10 folds dopamine (j), ascorbic (k) and uric acid (l).
